# Supplementary material for: Excessive daytime sleepiness and napping in cognitively normal adults: associations with subsequent amyloid deposition measured by PiB PET
Source: Oxford University Press journal article supplement (doi:10.1093/sleep/zsy152), 2018-09-05
Supplement: zsy152_suppl_supplementary_tables.docx [file zsy152_suppl_supplementary_tables.docx]

Supplemental Table 1. Distribution of napping frequency (*n* (%)).

| Rarely or never | 1-2 times/week | 3-5 times/week | Daily |
| --- | --- | --- | --- |
| 88 (71.5) | 23 (18.7) | 4 (3.3) | 8 (6.5) |

*N* = 123.

Supplemental Table 2. Association of EDS with napping frequency (*n* (row %)).

|  | Napping Frequency | |
| --- | --- | --- |
|  | 1-2 times/week or more | Rarely or never |
| EDS+ | 11 (37.9) | 18 (62.1) |
| EDS- | 24 (25.8) | 69 (74.2) |

*N* = 122; Fisher’s exact *p* = 0.24
